# Supplementary material for: Predictive value of liver and spleen stiffness measurement based on two-dimensional shear wave elastography for the portal vein pressure in patients with compensatory viral cirrhosis
Source: PeerJ. 2023 Sep 15;11:e15956. doi: 10.7717/peerj.15956 (PMC10506585; doi:10.7717/peerj.15956)
Supplement: Supplemental Information 1 [file peerj-11-15956-s001.xls]

## Sheet: Viral cirrhosis
Gender	Age	Course of disease	BMI	Hyperlipidemia	Hypertension	Coronary heart disease	Pathological type	Group	HVPG	LSM	SSM	Portal vein diameter	Spleen thickness
M	59	3.77	22.18	No	No	No	Compensatory viral cirrhosis	Severe	13.29	30.74	64.28	15.19	116.58
F	51	4.24	20.94	No	No	No	Compensatory viral cirrhosis	Severe	13.83	31.35	66.32	16.31	141.26
M	55	3.62	24	No	No	No	Compensatory viral cirrhosis	Severe	13.89	19.05	41.5	12.46	121.11
F	46	4.49	20.51	Yes	No	No	Compensatory viral cirrhosis	Severe	14.1	27.14	36.71	14.51	142.54
M	50	4.02	21.24	No	No	No	Compensatory viral cirrhosis	Severe	12.8	32.73	48.54	15.79	124.62
F	53	3.8	21.15	No	No	No	Compensatory viral cirrhosis	Severe	13.64	31.09	45.9	15.19	133.71
F	48	5.12	25.1	No	No	No	Compensatory viral cirrhosis	Severe	12.09	42.5	58.25	16.08	125.95
F	56	3.5	25.67	No	No	No	Compensatory viral cirrhosis	Severe	17.98	32.97	47.91	14.9	127.49
M	45	5.17	22.2	No	Yes	No	Compensatory viral cirrhosis	Severe	12.01	20.42	47.42	14.72	121.27
F	58	3.49	25.74	Yes	Yes	Yes	Compensatory viral cirrhosis	Severe	14.66	34.39	71.55	15.27	129.51
F	50	3.43	23.89	No	No	No	Compensatory viral cirrhosis	Severe	15.61	28.71	56.76	15.36	126.08
M	49	4.71	22.36	Yes	No	No	Compensatory viral cirrhosis	Severe	11.86	35.97	46.98	16.74	129.28
M	56	4.23	25.29	No	No	No	Compensatory viral cirrhosis	Severe	14.67	35.17	53.43	17.23	132.69
F	52	4.39	22.89	Yes	Yes	Yes	Compensatory viral cirrhosis	Severe	17.14	34.45	58.23	13.31	115.68
F	55	4.35	27.98	No	Yes	No	Compensatory viral cirrhosis	Severe	14.85	36.95	60.38	17.12	129.99
M	51	3.72	24.06	Yes	No	No	Compensatory viral cirrhosis	Severe	13.65	35.7	57.53	16.03	111.58
M	52	3.87	21.11	No	No	No	Compensatory viral cirrhosis	Severe	13.01	32.91	62.3	15.69	130.04
M	52	4.78	19.71	No	No	No	Compensatory viral cirrhosis	Severe	15.11	33.4	49.29	15.45	134.62
M	55	4.66	21.62	Yes	No	Yes	Compensatory viral cirrhosis	Severe	13.91	29.14	68.88	13.29	130.91
F	50	3.72	25.77	No	No	No	Compensatory viral cirrhosis	Severe	15.28	31.69	44.42	15.08	122.02
M	59	4.63	19.91	No	No	No	Compensatory viral cirrhosis	Severe	12.9	34.81	58.85	17.63	125.7
F	60	4.74	23.15	Yes	Yes	No	Compensatory viral cirrhosis	Severe	16.72	31.51	69.66	15.39	131.45
F	49	3.37	23.14	No	No	No	Compensatory viral cirrhosis	Severe	18.56	43.06	43.88	17.28	117.74
M	49	4.16	17.41	Yes	Yes	Yes	Compensatory viral cirrhosis	Severe	11.32	35.71	36.95	14.58	138.11
M	53	3.32	15.16	No	No	No	Compensatory viral cirrhosis	Severe	14.31	25.18	58.2	12.53	127.18
M	67	4.44	24.88	No	No	No	Compensatory viral cirrhosis	Severe	15.53	35.98	70.04	16.62	130.35
M	59	3.08	23.37	No	No	No	Compensatory viral cirrhosis	Severe	13.68	20.21	58.22	15.71	119.38
F	61	3.52	19.21	No	No	No	Compensatory viral cirrhosis	Mild	6.12	16.82	43.11	14.15	126.03
M	51	4.1	19.4	No	No	No	Compensatory viral cirrhosis	Mild	8.54	24.21	49.92	11.86	122.7
F	53	5.07	26.44	No	No	No	Compensatory viral cirrhosis	Mild	5.73	20.86	45.69	12.7	116.33
M	62	3.75	24.49	Yes	No	No	Compensatory viral cirrhosis	Mild	9.29	25.67	55.27	14.03	113.99
M	49	4.23	23.46	No	No	No	Compensatory viral cirrhosis	Mild	6.98	19.55	50.92	15.11	117.54
F	55	5.3	21.19	No	No	No	Compensatory viral cirrhosis	Mild	5.91	27.97	37.51	13.76	123.21
F	48	5.6	25.27	Yes	No	Yes	Compensatory viral cirrhosis	Mild	6.18	27.81	46.26	15.76	135.78
M	55	3.35	25.06	No	No	No	Compensatory viral cirrhosis	Mild	7.99	17.47	42.25	14.67	113.1
F	55	3.75	26.06	Yes	Yes	No	Compensatory viral cirrhosis	Mild	6.09	28.75	52.45	13.73	120.37
F	54	4.01	25.19	No	No	No	Compensatory viral cirrhosis	Mild	7.74	19.49	39.35	11.43	119.71
F	48	4.73	23.16	No	No	No	Compensatory viral cirrhosis	Mild	7.07	20.56	44.17	12.32	122.3
M	46	3.04	19.96	Yes	No	No	Compensatory viral cirrhosis	Mild	7.87	15.41	51.97	15.35	116.47
F	49	4.49	24.71	No	No	No	Compensatory viral cirrhosis	Mild	9.51	17.25	41.14	16.02	116
M	54	3.92	25.85	No	No	No	Compensatory viral cirrhosis	Mild	5.63	22.68	33.92	14.35	111.8
F	50	3.61	24.25	No	No	No	Compensatory viral cirrhosis	Mild	7.36	24.62	45.19	13.7	127.79
M	49	4.4	21.61	Yes	No	No	Compensatory viral cirrhosis	Mild	5.85	27.91	39.8	15.48	111.59
F	49	3.56	20.68	No	No	Yes	Compensatory viral cirrhosis	Mild	8.59	25.81	31.14	15.12	125.38
M	53	4.44	22.62	Yes	Yes	No	Compensatory viral cirrhosis	Mild	6.52	11.19	54.61	14.51	107.23
M	55	3.78	23.7	No	No	No	Compensatory viral cirrhosis	Mild	8.6	18.17	35.33	13.82	110.44
M	54	5.01	25.49	Yes	No	No	Compensatory viral cirrhosis	Mild	7.05	26.73	44.11	14.21	116.62
F	67	4.18	22.88	Yes	No	No	Compensatory viral cirrhosis	Mild	6.9	21.3	40.67	14.72	110.74
M	56	5.24	26.67	No	No	No	Compensatory viral cirrhosis	Mild	6.74	20.77	40.95	12.75	120.25
F	46	4.61	28.38	No	No	No	Compensatory viral cirrhosis	Mild	5.66	31.6	50.06	13.97	128.75
M	49	4.32	24.17	No	No	No	Compensatory viral cirrhosis	Mild	9.39	23.58	53.08	14.26	116.32
M	55	4.25	22.74	Yes	Yes	No	Compensatory viral cirrhosis	Mild	6.51	17.24	47.37	13.35	117.22
M	54	3.9	18.85	Yes	Yes	Yes	Compensatory viral cirrhosis	Mild	6.14	32.26	58.32	14.52	123.34
F	57	3.77	22.57	Yes	Yes	No	Compensatory viral cirrhosis	Mild	8.16	38.03	37.39	16.36	115.03
M	51	5.38	18.75	No	No	No	Compensatory viral cirrhosis	Mild	7.04	27.42	46.15	13.06	117.89
M	46	4.65	19.62	Yes	No	No	Compensatory viral cirrhosis	Mild	7.73	22.55	49.44	15.42	119.36
F	53	3.32	20.59	No	No	No	Compensatory viral cirrhosis	Mild	5.63	17.88	40.13	14.25	110.58
M	51	5.15	25.67	Yes	Yes	No	Compensatory viral cirrhosis	Mild	5.97	18.96	39.81	13.07	113.66
M	46	4.26	20.94	No	No	No	Compensatory viral cirrhosis	Mild	6.51	35.04	55.4	14.18	119.29
F	56	4.17	22.72	No	No	No	Compensatory viral cirrhosis	Mild	8.41	17.61	48.76	13.55	117.67
M	45	4.47	22.53	Yes	No	No	Compensatory viral cirrhosis	Mild	8.01	26.4	48.58	15.27	121.81
M	55	3.73	24.22	No	No	No	Compensatory viral cirrhosis	Mild	7.16	25.83	55.47	13.27	120.58
M	63	4.34	21.28	No	No	No	Compensatory viral cirrhosis	Without high pressure	2.89	15.43	32.22	13.47	111.03
M	52	4.09	21.12	No	No	No	Compensatory viral cirrhosis	Without high pressure	3.19	14.95	34.75	13.09	100.02
F	54	4.55	20.28	Yes	Yes	Yes	Compensatory viral cirrhosis	Without high pressure	2.51	16.22	28.4	12.52	93.56
F	52	3.72	25.67	No	No	No	Compensatory viral cirrhosis	Without high pressure	3.39	14.77	27.53	14.11	100.79
M	54	3.87	26.5	No	No	No	Compensatory viral cirrhosis	Without high pressure	2.11	15.25	31.4	16.03	112.28
F	47	3.94	22.23	No	No	No	Compensatory viral cirrhosis	Without high pressure	2.53	12.94	26.96	12.63	111.17
M	54	3.94	24.47	No	Yes	No	Compensatory viral cirrhosis	Without high pressure	4.02	14.02	26.12	14.18	104.82
M	47	2.71	24.17	Yes	No	No	Compensatory viral cirrhosis	Without high pressure	3.06	15.1	32.48	11.73	102.74
M	59	3.92	22.12	Yes	No	No	Compensatory viral cirrhosis	Without high pressure	2.77	13.65	30.63	13.24	108.94
M	47	4.91	21.23	No	No	No	Compensatory viral cirrhosis	Without high pressure	3.07	20.12	35.08	13.64	105.9
M	59	4.64	24.03	No	No	No	Compensatory viral cirrhosis	Without high pressure	2.57	5.91	35.38	14.87	115.45
M	45	3.96	20.51	Yes	No	No	Compensatory viral cirrhosis	Without high pressure	3.52	10.47	28.58	12.36	108.39
M	57	4.93	22.63	No	No	No	Compensatory viral cirrhosis	Without high pressure	3.33	13.33	20.7	12.4	93.35
M	53	4.18	20.42	No	Yes	No	Compensatory viral cirrhosis	Without high pressure	3.44	13.1	21.68	10.76	102.29
M	55	4.64	22.04	No	No	No	Compensatory viral cirrhosis	Without high pressure	3.94	12.7	30.64	15.06	110.36
M	59	3.46	20.64	No	No	No	Compensatory viral cirrhosis	Without high pressure	3.66	13.39	22.11	14.35	111.4
F	58	4.29	21.88	No	No	No	Compensatory viral cirrhosis	Without high pressure	3.42	16.44	35.22	13.39	104.51
F	60	3.9	22.88	No	No	No	Compensatory viral cirrhosis	Without high pressure	2.98	16.23	28.98	12.52	110.51
M	52	3.91	24.8	No	No	No	Compensatory viral cirrhosis	Without high pressure	3.15	15.93	30.05	14.05	107.96
M	60	3.87	21.74	Yes	Yes	Yes	Compensatory viral cirrhosis	Without high pressure	3.11	8.18	25.56	13.66	103.97
F	54	4.44	24	No	No	No	Compensatory viral cirrhosis	Without high pressure	3.57	15.84	33.05	14.85	105.94
M	59	3.17	21.33	No	No	No	Compensatory viral cirrhosis	Without high pressure	2.56	11.67	30.54	11.77	100.05
M	52	5.03	22.68	No	Yes	Yes	Compensatory viral cirrhosis	Without high pressure	2.76	17.46	31.89	12.26	107.34
F	56	4.9	17.47	No	No	No	Compensatory viral cirrhosis	Without high pressure	3.42	12.49	32.77	15.65	102.39
M	48	4.32	23.81	Yes	Yes	No	Compensatory viral cirrhosis	Without high pressure	2.96	18.94	28.3	11.35	105.32
F	55	3.07	20.85	No	No	No	Compensatory viral cirrhosis	Without high pressure	3.24	18.52	35.11	13.5	119.32
F	49	3.97	24.33	No	No	No	Compensatory viral cirrhosis	Without high pressure	2.75	11.51	23.04	10.77	105.57
M	58	3.52	20.3	No	No	No	Compensatory viral cirrhosis	Without high pressure	3.24	12.66	21.77	12.59	104.28
M	52	3.88	23.74	No	No	No	Compensatory viral cirrhosis	Without high pressure	2.69	14.18	26.01	12.67	105.59
M	50	3.51	21.63	No	No	No	Compensatory viral cirrhosis	Without high pressure	3.5	19.48	26.29	10.24	96.69
M	47	5.13	26.2	Yes	No	No	Compensatory viral cirrhosis	Without high pressure	3.05	15.5	23.54	12.9	102.07
F	50	4.4	26.81	No	No	No	Compensatory viral cirrhosis	Without high pressure	2.67	18.84	30.85	14.6	110.14
M	61	4.3	27.7	No	No	No	Compensatory viral cirrhosis	Without high pressure	3.76	14.42	29.37	12.77	94.47
M	54	4.35	25.18	No	No	No	Compensatory viral cirrhosis	Without high pressure	3.29	11.79	29.35	12.41	114.56
F	56	3.85	23.99	Yes	No	No	Compensatory viral cirrhosis	Without high pressure	3.47	11.11	28.13	15.55	107.6
M	64	3.93	24.38	No	No	No	Compensatory viral cirrhosis	Without high pressure	3.44	18.62	21.37	14.54	117.76
F	57	2.89	28.1	No	No	No	Compensatory viral cirrhosis	Without high pressure	3.33	11.91	24.23	14.36	112.38
M	56	4.71	22.03	No	No	No	Compensatory viral cirrhosis	Without high pressure	3.04	14.13	34.98	12.85	101.62
M	57	4.05	21.55	Yes	Yes	No	Compensatory viral cirrhosis	Without high pressure	3.41	14.96	30.36	15.51	107.72
F	58	4.45	28.5	No	No	No	Compensatory viral cirrhosis	Without high pressure	2.91	16.23	31.32	14.2	105.73
F	44	3.64	24.74	No	No	No	Compensatory viral cirrhosis	Without high pressure	4.24	16.03	26.7	14.12	112.26
M	58	3.81	27.6	No	No	No	Compensatory viral cirrhosis	Without high pressure	3.1	15.99	26.73	16.65	102.56
F	54	3.88	20.79	No	No	No	Compensatory viral cirrhosis	Without high pressure	3.14	18.42	21.93	14.24	96.94
M	56	4.15	22.03	No	No	No	Compensatory viral cirrhosis	Without high pressure	3.7	9.37	24.68	13.38	115.23
F	62	5.53	19.28	No	No	No	Compensatory viral cirrhosis	Without high pressure	4.2	15.49	39.52	13.56	107.08

## Sheet: Hepatitis
Gender	Age	Course of disease	BMI	Hyperlipidemia	Hypertension	Coronary heart disease	Pathological type	LSM	SSM	Portal vein diameter	Spleen thickness
F	56	4.43	24.6	No	No	No	Viral hepatitis	16.69	26.06	9.68	83.72
M	61	3.86	20.91	Yes	No	No	Viral hepatitis	10.79	32.2	9.71	93.64
F	57	4.23	21.21	No	No	No	Viral hepatitis	13.13	30.99	11.15	81.13
F	53	3.16	21.25	No	No	No	Viral hepatitis	13.59	17.32	8.7	113.18
M	49	4.39	25.13	No	No	No	Viral hepatitis	11.71	18.34	9.09	104.33
M	51	4.37	22.21	No	No	No	Viral hepatitis	7.17	36.04	9.71	95.2
M	47	3.42	22.93	No	Yes	No	Viral hepatitis	10.63	33.87	10.67	92.14
F	48	4.2	24.73	Yes	Yes	Yes	Viral hepatitis	10.42	39.01	10.14	86.97
F	58	5.6	21.24	No	No	No	Viral hepatitis	17.86	31.18	10.83	99.52
M	60	4.43	24.65	No	No	No	Viral hepatitis	8.84	27.03	12.64	104.29
M	48	3.81	22.55	Yes	Yes	No	Viral hepatitis	5.85	23	8.79	104.56
M	56	4.37	18.3	Yes	No	No	Viral hepatitis	12.84	27.24	8.86	109.95
F	49	4.36	20.86	No	No	No	Viral hepatitis	11.4	16.92	13.37	96.07
M	53	4.52	23.16	No	No	No	Viral hepatitis	6.78	24.59	5.75	90.25
F	44	4.52	22.13	No	No	No	Viral hepatitis	10.22	21.79	13.22	98.68
M	50	4.11	23.22	Yes	Yes	No	Viral hepatitis	8.63	22.93	11.29	92.31
F	56	3.8	24.63	No	No	No	Viral hepatitis	11.44	16.76	13.07	103.66
F	51	4.37	26.81	No	No	No	Viral hepatitis	10.19	29.07	6.79	89.93
M	63	3.92	28.36	No	No	No	Viral hepatitis	10.62	20.05	10.75	99.93
M	53	4.52	22.94	Yes	Yes	Yes	Viral hepatitis	14.85	22.77	9.16	96.08
M	54	2.86	21.95	No	No	No	Viral hepatitis	12.09	29.64	9.35	99.9
M	54	3.51	21.44	No	No	No	Viral hepatitis	11.44	30.31	11.86	92.55
M	56	5.23	21.93	Yes	No	No	Viral hepatitis	9.84	19.94	10.05	113.54
M	53	3.45	28.52	No	No	No	Viral hepatitis	6.37	24.2	8.59	104.92
M	58	2.83	24.27	No	No	No	Viral hepatitis	11.77	37.3	11.12	114.47
F	55	3.86	23.78	Yes	Yes	No	Viral hepatitis	14.08	15.67	9.88	101.88
F	55	4.13	21.25	No	No	No	Viral hepatitis	14.29	14.09	8.44	102.6
M	62	4.82	22.06	No	No	No	Viral hepatitis	6.37	24.8	9.35	94.95
F	53	3.94	26.78	Yes	No	No	Viral hepatitis	14.69	24.76	10.98	111.03
M	44	4.13	24.44	No	Yes	Yes	Viral hepatitis	13.76	31.57	11.57	109.74
F	50	3.55	26.92	No	No	No	Viral hepatitis	11.37	22.58	10.82	90.95
F	56	4.3	28.55	No	No	No	Viral hepatitis	12	20.66	12.69	115.57
M	52	5.32	26.08	Yes	No	No	Viral hepatitis	7.18	31.06	12.48	103.56
F	61	4.77	22.81	No	Yes	Yes	Viral hepatitis	11.07	22.37	10.71	100.97
F	61	3.69	23.07	No	No	No	Viral hepatitis	11.4	25.06	10.06	91.51
M	56	4.35	24.75	No	No	No	Viral hepatitis	8.75	26.44	8.3	106.61
F	49	4.82	26.61	No	No	No	Viral hepatitis	13.69	33.62	8.35	116.81
M	65	3.23	27.91	No	No	No	Viral hepatitis	13.39	27.31	8.07	88.08
M	57	3.8	23.32	Yes	No	No	Viral hepatitis	10.26	14.58	7.99	117.77
F	71	4.55	21.32	No	No	No	Viral hepatitis	14.22	33.53	10.53	100.85
M	61	3.62	27.8	No	No	No	Viral hepatitis	13.86	29.19	8.32	92.16
M	55	3.93	26.15	No	Yes	No	Viral hepatitis	10.51	33.8	11.11	96.17
M	55	3.75	21.77	Yes	No	No	Viral hepatitis	12.75	31.49	11.3	114.79
F	48	3.89	19.87	No	No	No	Viral hepatitis	18.53	41.87	11.73	103.09
F	45	4.61	28.92	No	No	No	Viral hepatitis	10.16	37.41	8.24	101.94
M	61	4.38	26.99	No	No	No	Viral hepatitis	6.71	18.55	8.81	92.97
F	55	4.51	20.79	No	No	No	Viral hepatitis	4.79	11.38	12.05	104.1
F	63	4.26	23.41	No	Yes	No	Viral hepatitis	12.72	38.11	12.3	93.49
M	56	4.42	24.81	No	No	No	Viral hepatitis	13.47	25.07	7.9	111.34
F	59	4.2	22.59	Yes	No	No	Viral hepatitis	14.22	27.78	9.39	102.96
M	58	3.48	22.94	No	Yes	No	Viral hepatitis	8.56	23.38	8.88	106.39
M	54	3.66	24.71	No	No	No	Viral hepatitis	10.82	35.28	13.67	119.77
F	57	3.45	23.14	Yes	Yes	No	Viral hepatitis	7.5	24.41	11.56	101.79
F	61	3.89	23.32	No	No	No	Viral hepatitis	14.69	24.08	11.64	93.42
M	55	4.2	19.89	No	No	No	Viral hepatitis	9.43	29.21	11.67	91.04
M	59	3.73	27.42	No	No	No	Viral hepatitis	14.8	35.21	10.78	80.04
M	58	4.4	25.52	No	No	No	Viral hepatitis	13.75	30.29	7.41	97.98
F	63	3.17	20.81	Yes	No	No	Viral hepatitis	6.46	26.43	9.12	76.5
F	53	3.69	23.68	No	No	No	Viral hepatitis	17.43	23.48	10.75	90.72
M	59	3.51	26.11	No	No	No	Viral hepatitis	5.77	33.77	12.17	89.07
M	51	3.14	21.12	No	No	No	Viral hepatitis	9.93	22.65	9.31	96.75
F	67	2.73	21.29	No	No	No	Viral hepatitis	14.02	22.27	13.09	96.47
F	58	4.92	24.03	No	No	No	Viral hepatitis	15.38	36.73	12.02	95.16
M	62	4.63	21.84	Yes	No	Yes	Viral hepatitis	12.66	31.46	10.35	111.72
F	54	3.12	24.1	No	No	No	Viral hepatitis	11.14	21.4	10.38	77.49
M	50	4.02	23.39	No	No	No	Viral hepatitis	10.68	31.52	11.52	94.12
M	60	4.31	23.81	No	No	No	Viral hepatitis	12.65	19.39	7.37	93.08
F	52	5.71	28.97	No	No	No	Viral hepatitis	12.57	27.95	11.68	95.54
F	60	4.56	24.03	Yes	No	No	Viral hepatitis	13.29	28.39	12.94	97.17
M	48	4	25.16	No	No	No	Viral hepatitis	14.12	18.65	9.31	106.01
F	50	4.08	27.67	No	No	No	Viral hepatitis	15.72	21.72	11.77	115.27
M	56	3.47	24.95	Yes	No	No	Viral hepatitis	11.02	19.42	7.83	97.11
F	62	3.46	21.62	No	No	No	Viral hepatitis	19.88	27.54	8.21	96.7
F	47	3.8	24.34	No	No	No	Viral hepatitis	8.99	29.7	12.74	95.97
M	60	3.9	20.67	No	No	No	Viral hepatitis	13.52	26.5	9.93	99.79
M	64	3.8	25.55	No	No	No	Viral hepatitis	13.23	26.18	5.88	100.03
